# Supplementary material for: Enantiomeric partitioning using fluorous biphase methodology for lipase-mediated (trans)esterifications
Source: Royal Society of Chemistry journal article supplement (doi:10.1039/b204607p), 2002-01-01
Supplement: b204607p.doc [file b204607p.doc]

# **Supplementary data**

# Preparative resolution of 2-methylpentanoic acid (**2**): 2-Methylpentanoic acid (**2**) (6 g, 51.6 mmol), 1H,1H,2H,2H-heptadecafluoro-1-decanol (**4**) (21.3 g, 45.8 mmol), PFH (150 ml), hexane (150 ml) and CRL‡ (5.0 g) were placed in a conical flask with a rubber septum. The mixture was shaken at 200 rpm at 40ºC. Anhydrous sodium sulphate (0.25 g) was added every 24 hours. After 96 hours the enzyme and salts were filtered off and the solid was washed with 30 ml of PFH and 30 ml of hexane. Liquid phases were collected, cooled (0ºC, 30 min.) and separated. The fluorous phase was subjected to distillation (for recycling and extraction of the hexane phase as described below). The residue contained (S)-**5** (ee 94%) and unreacted **4** and thus residue was combined with the CRL‡ (2 g) in phosphate buffer (350 ml, 0.2 M, pH 7) and the mixture was stirred at RT for 4 days. The aqueous solution was extracted with PFH (4x 200 ml) to recover **4** (13.3 g, 62%), acidified by adding conc. HCl and extracted into hexane (4x 150 ml). The hexane was evaporated to yield (S)-**2** (1.97 g, 66%, ee 96%, []­D22= 19.03). The original hexane phase was washed with PFH (6x 200 ml, recycled from the original fluorous phase). After washing the hexane was dried (Na2SO4) and the solvent removed under reduced pressure to yield (R)-**2** (1.81 g, 57 %, ee79%) containing less than 2% of (S)-[1H,1H,2H,2H]-heptadecafluorodecyl-2-methylpentanoate (**5**) as judged by GC-MS.

**Table** Enzyme-catalysed (*CRL*) esterifications and transesterifications with ‘fluorous’ alcohols in hexane/perfluorohexane (1:1 vol.) medium.

|  | | | | | |
| --- | --- | --- | --- | --- | --- |
| Ester/Acid | Alcohol | Reaction time [h]  (Temp. oC) | Conversion (%)  GC-MS | *S*-ester product,  ee (%) | *R*-ester/acid  unreacted, ee (%) |
| **1** | **4** | 44 (40) | 48 | 72 a | 44 b(2) |
| **1** | **10** | 51 (30) | 51 | 77 a | 33 b(2) |
| **1** | **11** | 44 (30) | 29 | 77 a | 17 b(1) |
| **2** | **4** | 95 (40) | 53 | 95 a | 79 b(5) |
| **3** | **4** | 149 (40) | 49 | 95 a | 94.5 b(5) |
| **7** | **11** | 44 (30) | 49 | 44 a | 18 b(1) |
| **8** | **4** | 25 (40) | 52 | 60 a | 45 b(5) |
| **9** | **12** | 42 (45) | 53 | 46 b(2) | 42 a |

a Combined fluorous phase. b  Washed hexane phase (number of washing with 1 vol. of fluorous phase)
